# Supplementary material for: Rapid and Large-Scale Synthesis of Chiral and Fluorescent Sulfur Quantum Dots for Intracellular Temperature Monitoring
Source: PubMed Central journal article supplement — Chem Biomed Imaging. 2024 Sep 20;2(12):817–24. doi: 10.1021/cbmi.4c00052 (PMC11673185; doi:10.1021/cbmi.4c00052), 2024-09-20
Supplement: im4c00052_si_001.pdf [file im4c00052_si_001.pdf]

# Supporting Information

## Rapid and Large-Scale Synthesis of Chiral and Fluorescent Sulfur Quantum Dots for Intracellular Temperature Monitoring

*Li Zhao<sup>#1</sup>, Tianjian Sha<sup>#1</sup>, Yufu Liu<sup>2</sup>, Qingsong Mei<sup>2\*</sup>, Haibin Li<sup>1</sup>, Pinghua Sun<sup>1,3</sup>, Haibo*

*Zhou<sup>1\*</sup>, and Huaihong Cai<sup>4\*</sup>*

<sup>1</sup> College of Pharmacy, Jinan University, Guangzhou, Guangdong 510632, China; E-mail: haibo.zhou@jnu.edu.cn, pinghuasunny@163.com

<sup>2</sup> School of Medicine, Jinan University, Guangzhou, Guangdong 510632, China; E-mail: qsmei@jnu.edu.cn

<sup>3</sup> Key Laboratory of Xinjiang Phytomedicine Resource and Utilization, Ministry of Education, School of Pharmacy, Shihezi University, Shihezi, Xinjiang 832003, China

<sup>4</sup> College of Chemistry and Materials Science, Jinan University, Guangzhou, Guangdong 510632, China; E-mail: thhcai@jnu.edu.cn

## Table of Contents

|                                                                                                                                                                                    |      |
|------------------------------------------------------------------------------------------------------------------------------------------------------------------------------------|------|
| <b>Figure S1.</b> Pictures of SQDs and traditional SQDs under UV-light. ....                                                                                                       | S-3  |
| <b>Figure S2.</b> Fluorescent photograph of purified SQDs.....                                                                                                                     | S-3  |
| <b>Figure S3.</b> The high-resolution N 1s spectrum of the SQDs. ....                                                                                                              | S-4  |
| <b>Figure S4.</b> Circular dichroism spectra of L- and D-cysteine. ....                                                                                                            | S-4  |
| <b>Figure S5.</b> UV-Vis absorption spectra. ....                                                                                                                                  | S-5  |
| <b>Figure S6.</b> The fluorescence spectra and circular dichroism spectra of Gly-SQDs. ....                                                                                        | S-5  |
| <b>Figure S7.</b> PL spectra of the time stability of SQDs.....                                                                                                                    | S-6  |
| <b>Figure S8.</b> PL spectra of SQDs dependent in different pH solution. ....                                                                                                      | S-6  |
| <b>Figure S9.</b> PL spectra of SQDs synthesized by using different concentrations of H <sub>2</sub> O <sub>2</sub> . ....                                                         | S-7  |
| <b>Figure S10.</b> UV absorption spectra of SQDs obtained by different concentrations of H <sub>2</sub> O <sub>2</sub> . ....                                                      | S-7  |
| <b>Figure S11.</b> PL spectra of SQDs obtained from different temperature. ....                                                                                                    | S-8  |
| <b>Figure S12.</b> PL spectra of SQDs obtained from different amount of L-Cysteine. ....                                                                                           | S-8  |
| <b>Figure S13.</b> Plots of integrated PL intensity of SQDs and quinine sulfate as a function of optical absorbance at 350 nm.....                                                 | S-9  |
| <b>Table S1.</b> Plots of integrated PL intensity of SQDs and quinine sulfate as a function of optical absorbance at 350 nm and relevant data. ....                                | S-9  |
| <b>Table S2.</b> Five different circumstances about sulfur quantum dots synthesis.....                                                                                             | S-10 |
| <b>Figure S14.</b> Temperature-dependent fluorescence intensity of SQDs. ....                                                                                                      | S-11 |
| <b>Figure S15.</b> Photos of the SQDs in different temperatures (20-50 °C) under UV-light.....                                                                                     | S-11 |
| <b>Figure S16.</b> Temperature-dependent fluorescence after storage for 7 d and 14 d. ....                                                                                         | S-12 |
| <b>Figure S17.</b> The fluorescence spectra and the calibration curves of fluorescence quenching efficiency within a range of 20-50 °C under different excitation wavelength. .... | S-13 |
| <b>Figure S18.</b> Cell viability. ....                                                                                                                                            | S-14 |
| <b>Figure S19.</b> Confocal fluorescence images of Hela cells.....                                                                                                                 | S-14 |
| <b>Figure S20.</b> Bright field images of Hela cells.....                                                                                                                          | S-15 |
| <b>Figure S21.</b> Confocal fluorescent images (DAPI and SQDs) of Hela cells. ....                                                                                                 | S-15 |
| <b>Figure S22.</b> Temperature dependent fluorescence intensity in cell. ....                                                                                                      | S-16 |
| <b>Figure S23.</b> Temperature dependent calibrated quenching efficiency in cell. ....                                                                                             | S-17 |

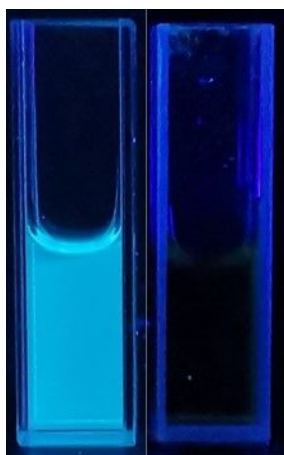

**Figure S1.** Picture of sulfur quantum dots under 365 nm UV-light through this method (Left).  
Picture of sulfur quantum dots synthesized by PEG-400-based traditional method (right).

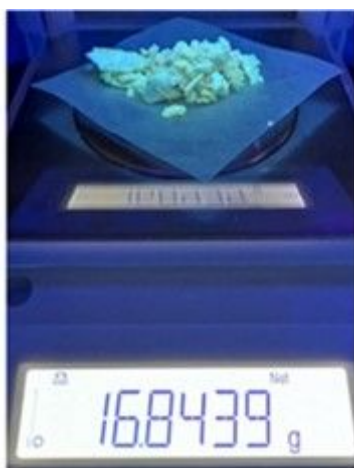

**Figure S2.** Fluorescent photograph of purified sulfur quantum dots for a patch of experiment.

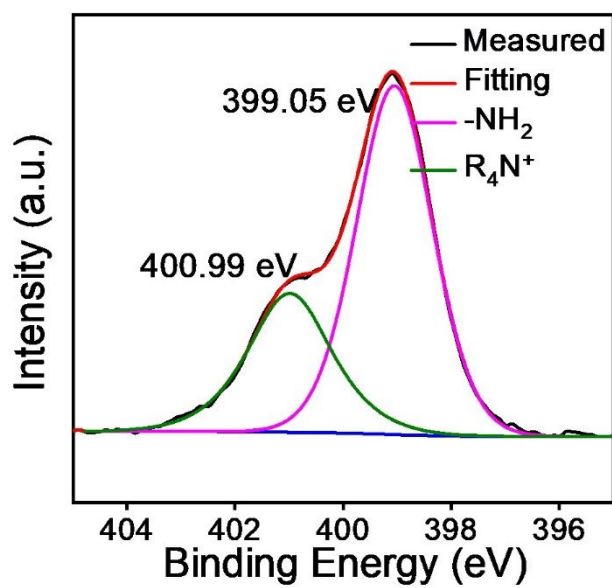

**Figure S3.** The high-resolution N 1s spectrum of the sulfur quantum dots.

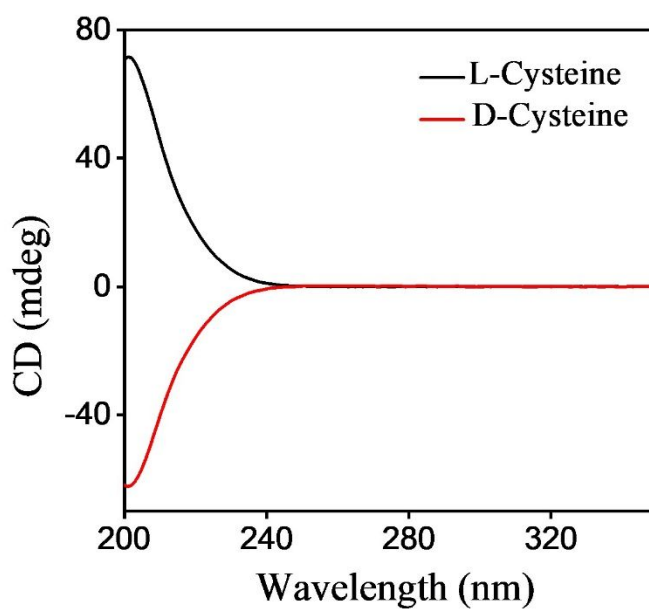

**Figure S4.** Circular dichroism spectra of L- and D-cysteine.

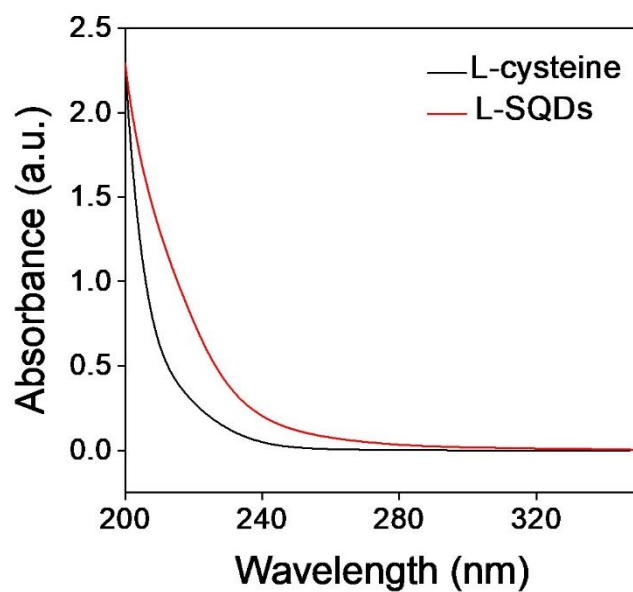

**Figure S5.** UV-Vis absorption spectra of the L-cysteine and L-sulfur quantum dots.

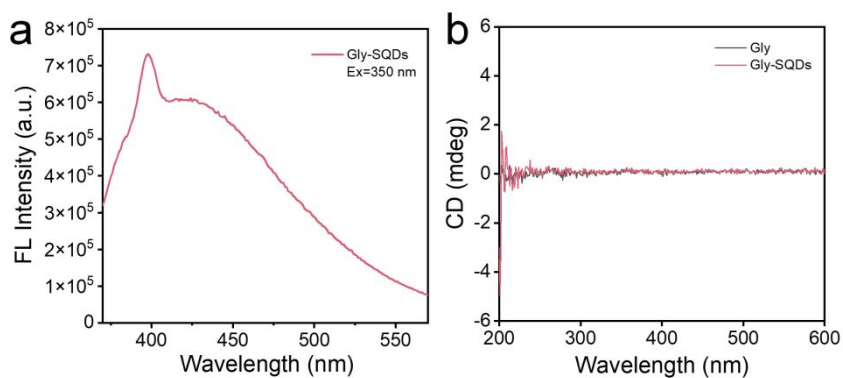

**Figure S6.** (a) The fluorescence spectra of Glycine-SQDs. (b) The Circular dichroism spectra of Glycine and Glycine-SQDs.

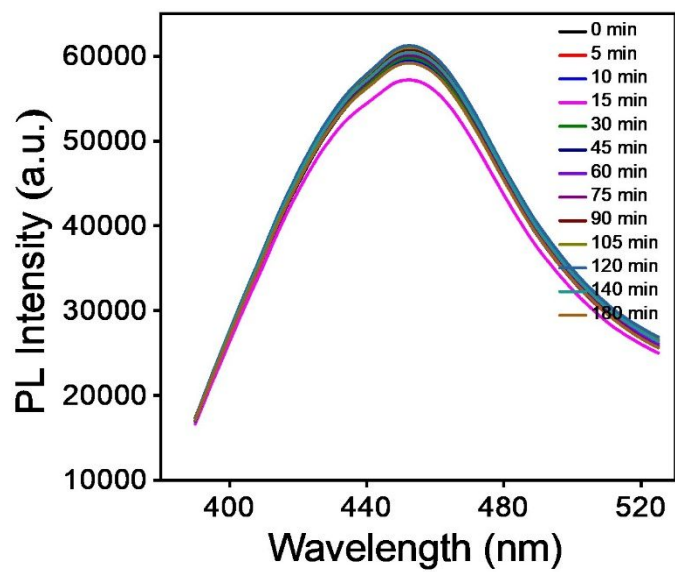

**Figure S7.** PL spectra of the time stability of sulfur quantum dots.

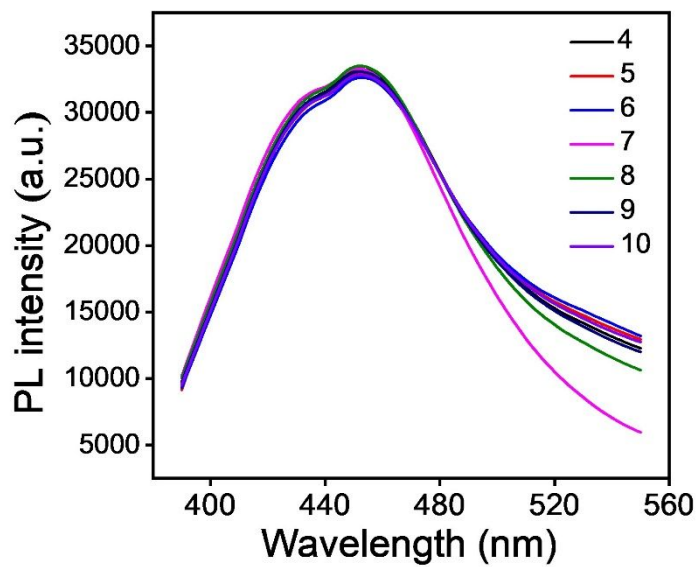

**Figure S8.** PL spectra of sulfur quantum dots dependent in different pH solution.

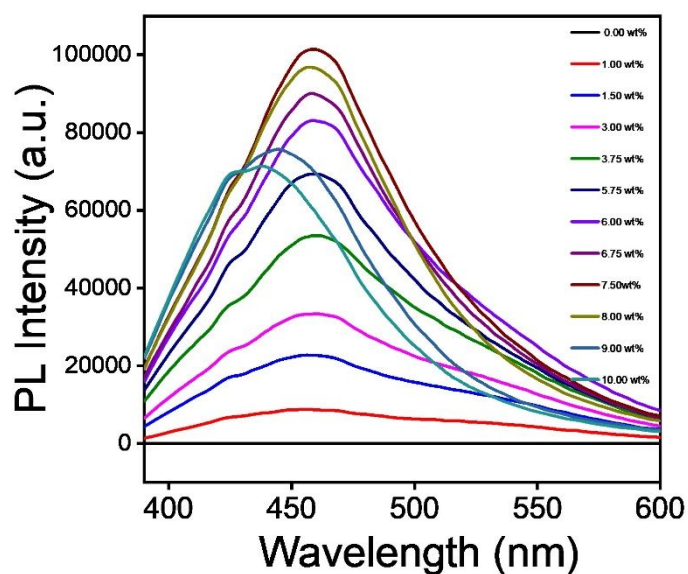

**Figure S9.** PL spectra (excited at 370 nm) of sulfur quantum dots synthesized by using different concentrations of  $\text{H}_2\text{O}_2$ .

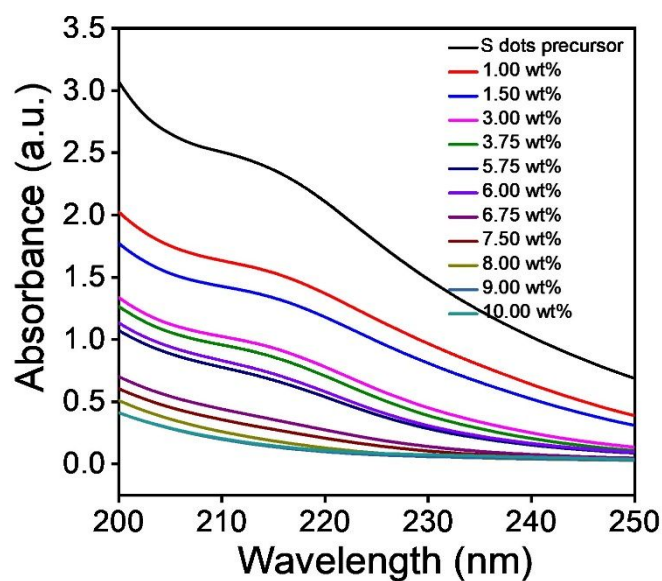

**Figure S10.** UV absorption spectra of sulfur quantum dots synthesized by adding different concentrations of  $\text{H}_2\text{O}_2$ .

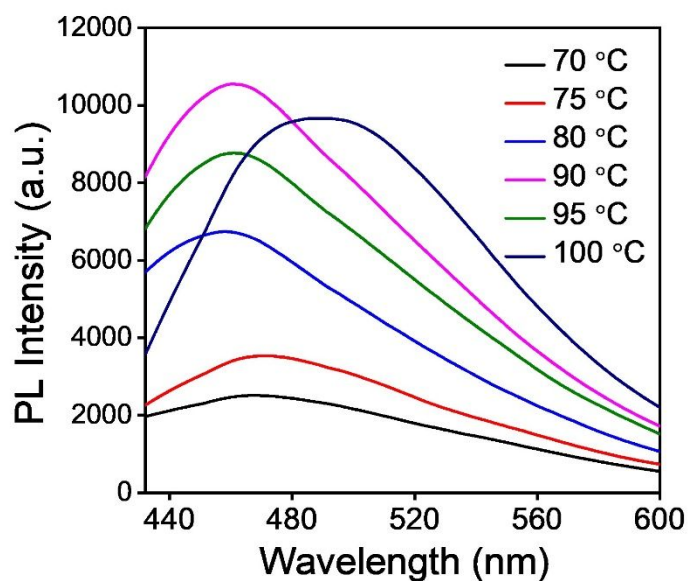

**Figure S11.** PL spectra of sulfur quantum dots obtained from the reaction heated to different temperature, and other conditions are: 0.7 g sublimed sulfur power, 2.1 g L-Cysteine, 2.1 g NaOH and 35 mL water.

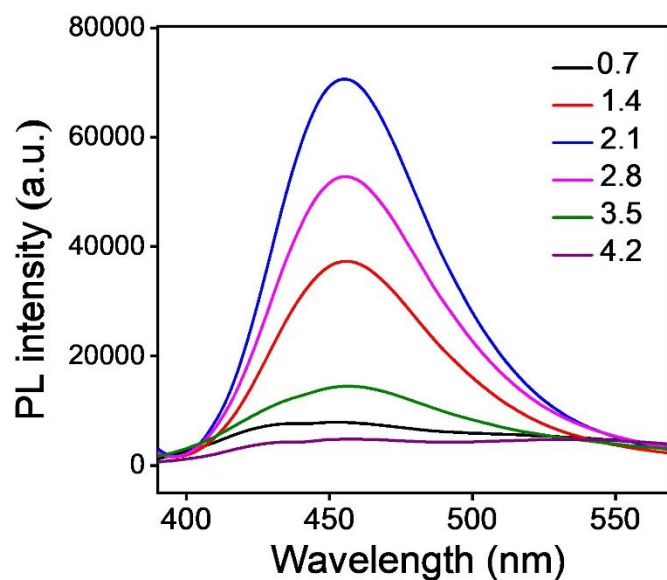

**Figure S12.** PL spectra of sulfur quantum dots obtained from the reaction using different amount L-Cysteine, and other conditions: 0.7 g sublimed sulfur power, 2.1 g NaOH, 35 mL water and 90 °C reaction temperature



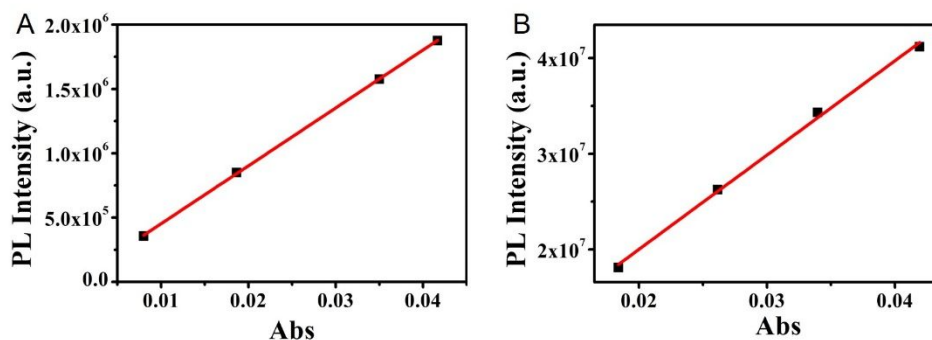

**Figure S13.** Plots of integrated PL intensity of SQDs and quinine sulfate as a function of optical absorbance at 350 nm.

**Table S1.** Plots of integrated PL intensity of SQDs and quinine sulfate as a function of optical absorbance at 350 nm and relevant data.

| Sample          | Abs | PL Intensity | Slope (I/A)        | QY                 |       |
|-----------------|-----|--------------|--------------------|--------------------|-------|
| SQDs            | 1   | 0.042        | $1.88 \times 10^6$ | $4.50 \times 10^7$ | 2.51% |
|                 | 2   | 0.035        | $1.58 \times 10^6$ |                    |       |
|                 | 3   | 0.019        | $8.50 \times 10^5$ |                    |       |
|                 | 4   | 0.008        | $3.57 \times 10^5$ |                    |       |
| Quinine Sulfate | 1   | 0.042        | $4.12 \times 10^7$ | $9.85 \times 10^8$ | 55%   |
|                 | 2   | 0.034        | $3.43 \times 10^7$ |                    |       |
|                 | 3   | 0.026        | $2.63 \times 10^7$ |                    |       |
|                 | 4   | 0.018        | $1.81 \times 10^7$ |                    |       |

**Table S2.** Five different circumstances about sulfur quantum dots synthesis. Sample 1: precursor contained sulfur powder, NaOH and cysteine. Then, added H<sub>2</sub>O<sub>2</sub> into precursor. Sample 2: precursor contained sulfur powder, NaOH and PEG-400. Then, added H<sub>2</sub>O<sub>2</sub> into precursor. Sample 3: precursor contained sulfur powder and NaOH. Sample 4: precursor contained cysteine and NaOH. Sample 5: precursor contained sulfur powder and cysteine. Step 1 synthesis conditions: 90 °C stirred under atmosphere for 10 min. Step 2 synthesis conditions (sample 1 and sample 2): 7.5% H<sub>2</sub>O<sub>2</sub> dropped into the precursor with vigorously stirring under atmosphere (volume ratio of precursor to H<sub>2</sub>O<sub>2</sub> is 4:3).

| Sample number | Step 1    |      |          |         | Step 2                                                                                |                               |                                                                                     |
|---------------|-----------|------|----------|---------|---------------------------------------------------------------------------------------|-------------------------------|-------------------------------------------------------------------------------------|
|               | Precursor |      |          |         | Phenomenon                                                                            | H <sub>2</sub> O <sub>2</sub> | Phenomenon                                                                          |
|               | Sulfur    | NaOH | Cysteine | PEG-400 |                                                                                       |                               |                                                                                     |
| 1             | √         | √    | √        |         |    | √                             |  |
| 2             | √         | √    |          | √       |    | √                             |  |
| 3             | √         | √    |          |         |   |                               |                                                                                     |
| 4             |           | √    | √        |         |  |                               |                                                                                     |
| 5             | √         |      | √        |         |  |                               |                                                                                     |

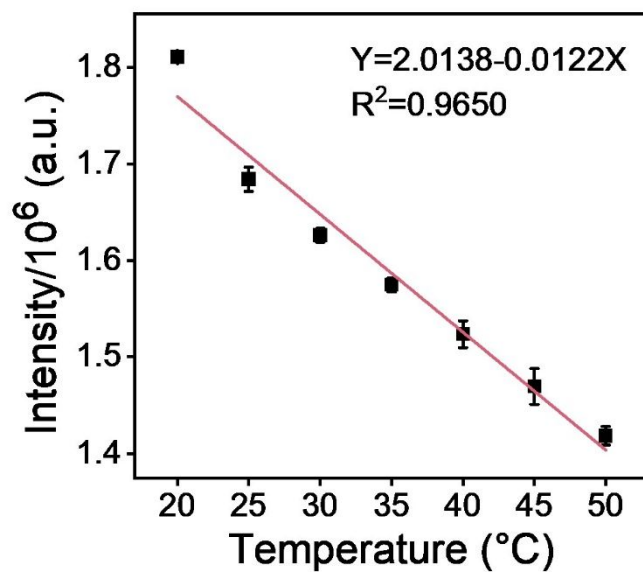

**Figure S14.** Temperature-dependent fluorescence intensity of SQDs in water within a range of 20-50 °C.

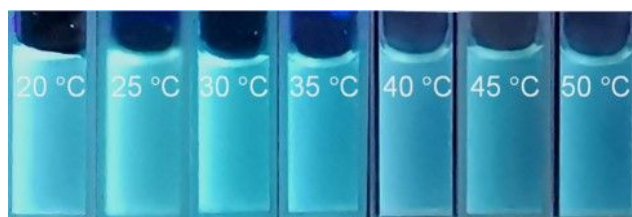

**Figure S15.** Photos of the SQDs in different temperatures (20-50 °C) under UV light.

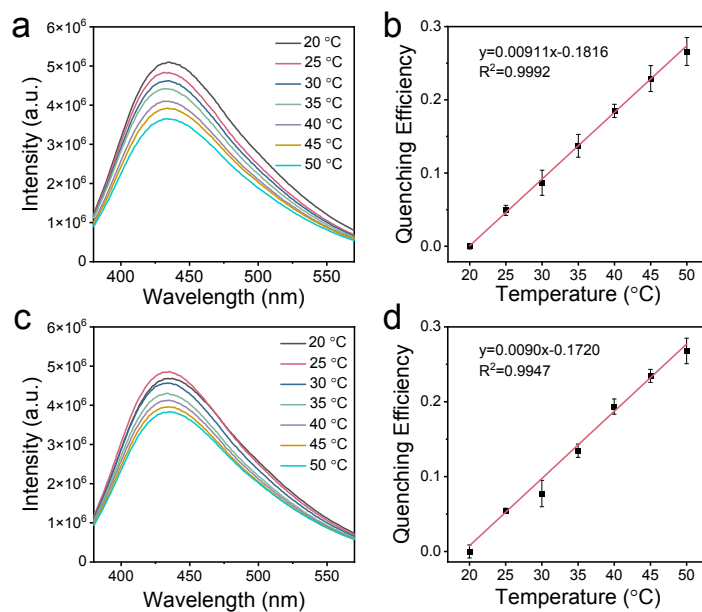

**Figure S16.** Temperature-dependent fluorescence variations and the quenching efficiency linear calibrations of SQDs aqueous solution within a range of 20-50 ° C after storage for 7 d (a and b) and 14 d (c and d).

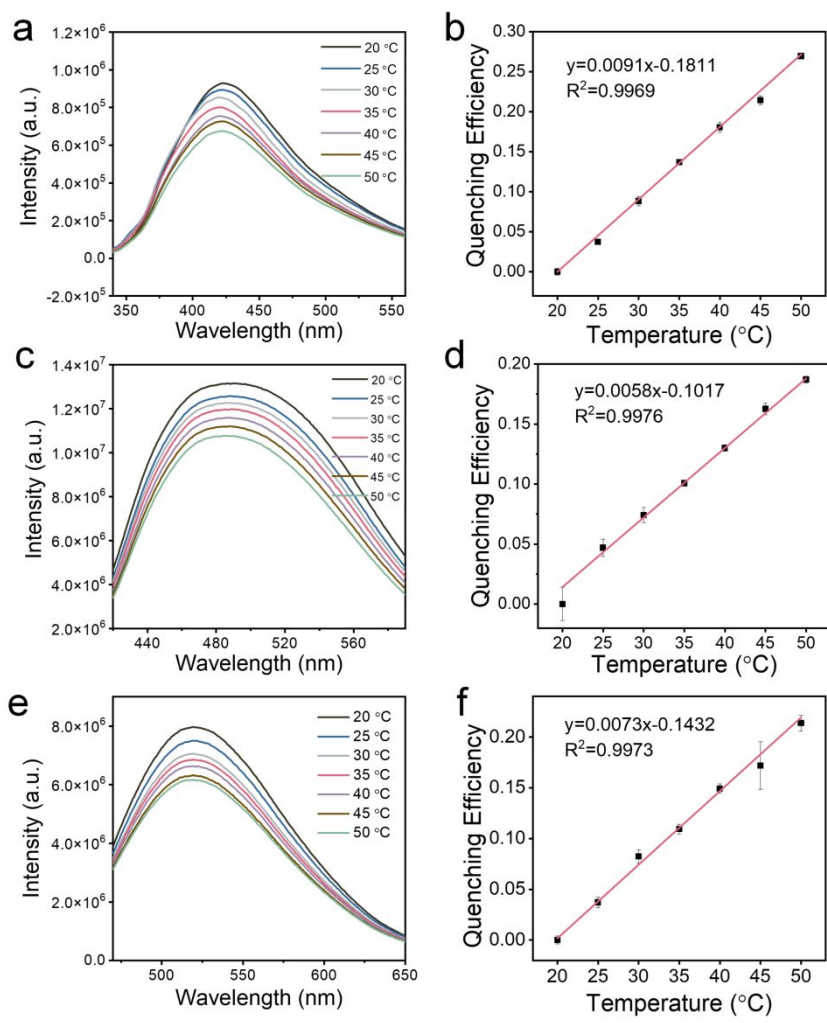

**Figure S17.** The fluorescence spectra and the calibration curves of fluorescence quenching efficiency within a range of 20-50 °C under different excitation wavelength. (a and b) Ex=325 nm, (c and d) Ex=400 nm, (e and f) Ex=450 nm.

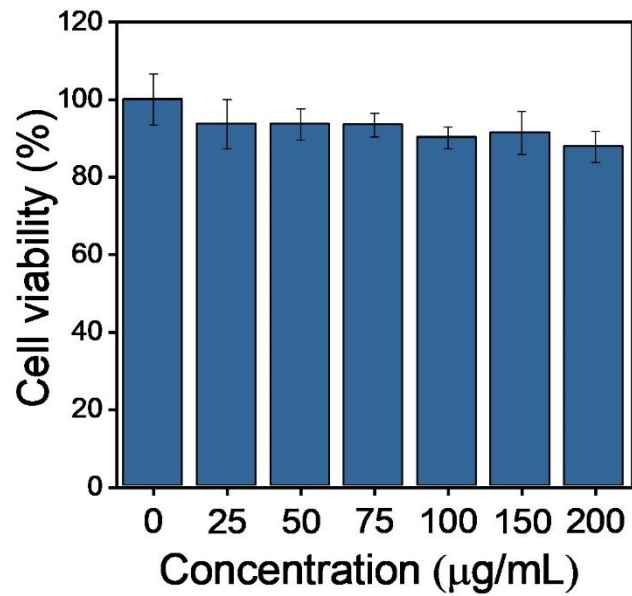

**Figure S18.** Cell viability of HeLa cells incubated with different concentrations of SQDs.

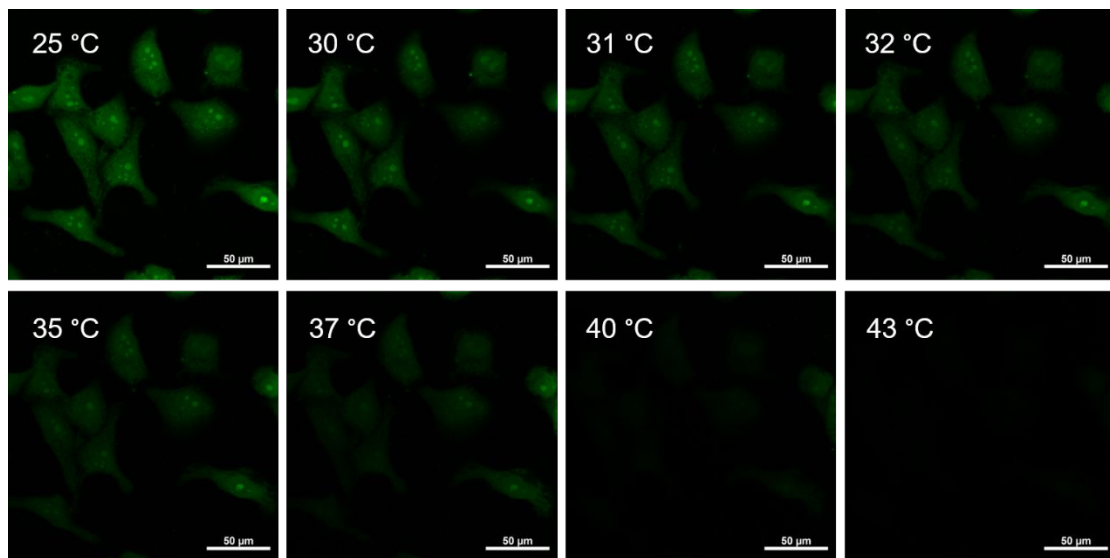

**Figure S19.** Confocal fluorescence images of HeLa cells obtained in the temperature range of 25 °C to 43 °C (Scale bar: 20 µm).

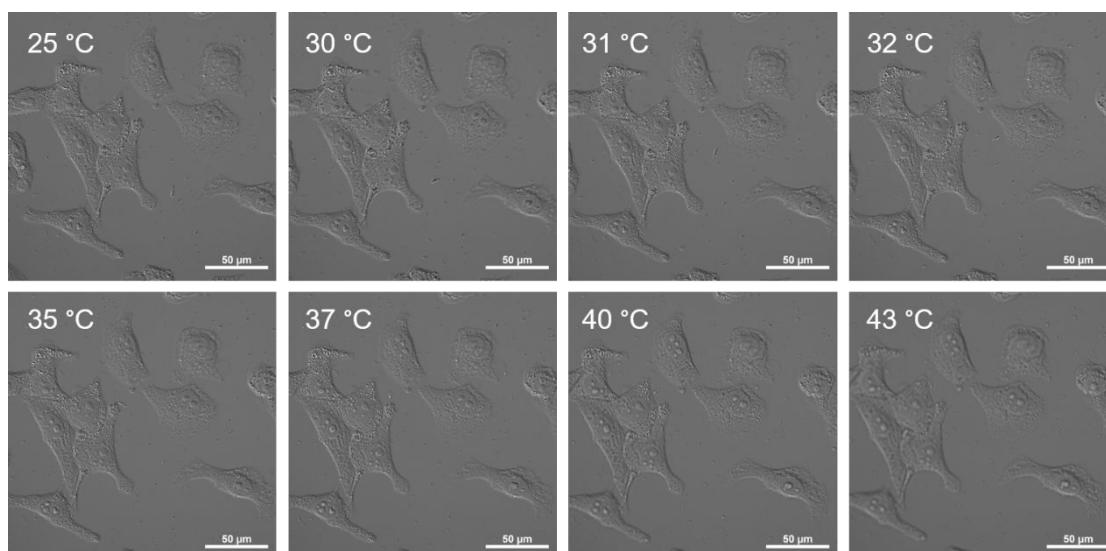

**Figure S20.** Bright field images of HeLa cells obtained in the temperature range of 25 °C to 43 °C (Scale bar: 20 μm).

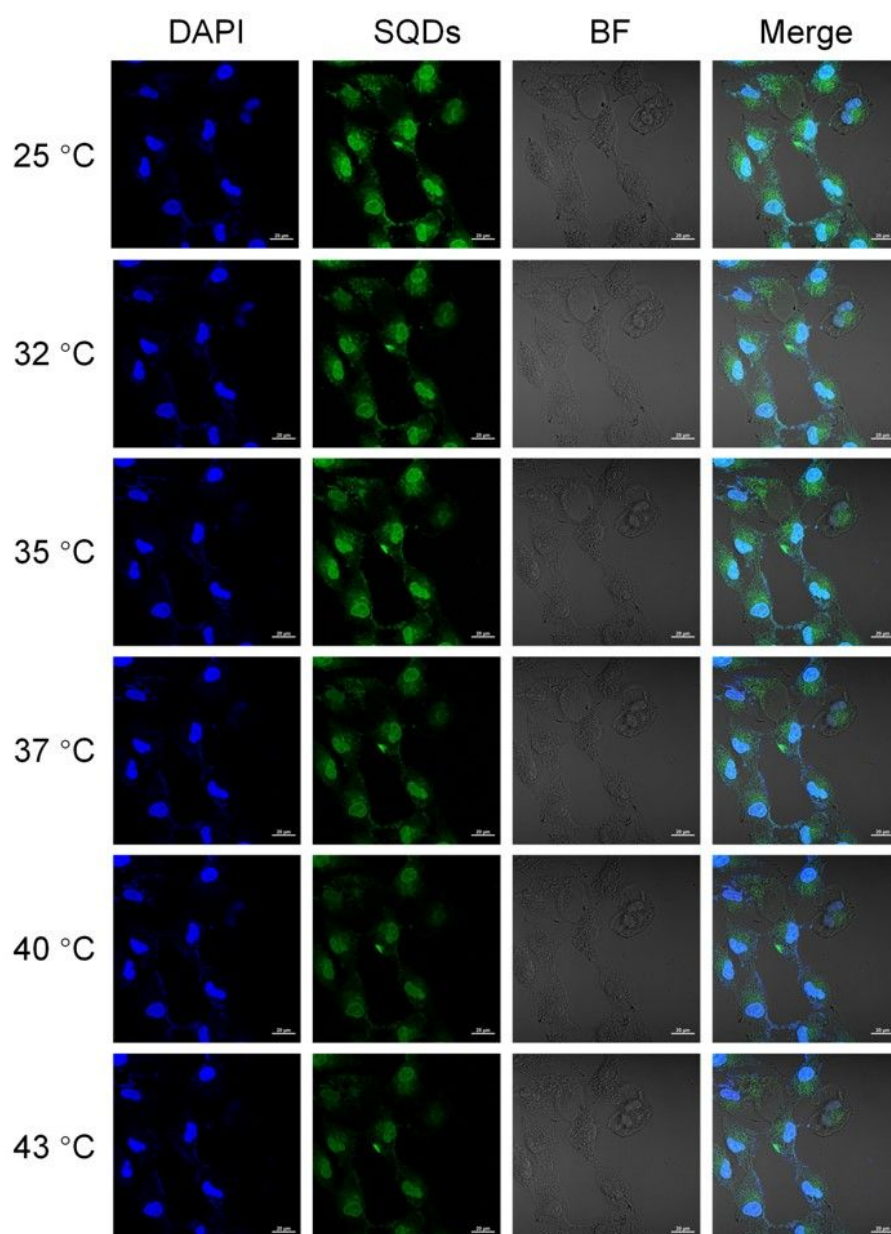

**Figure S21.** Confocal fluorescent images of HeLa cells obtained at different temperatures.

Scale bars are 20  $\mu\text{m}$ .



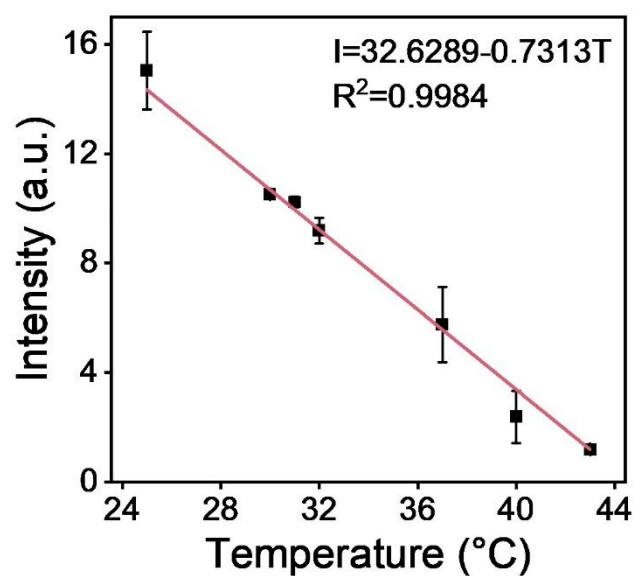

**Figure S22.** Temperature dependent calibration curve of fluorescence intensity in cell (25 °C-43 °C).

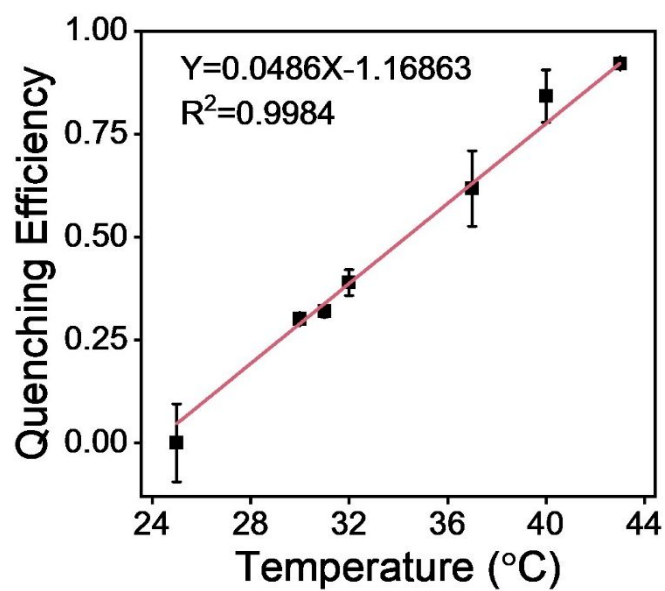

**Figure S23.** Temperature dependent calibration curve of fluorescence quenching efficiency in cell (25 °C-43 °C).
